# Supplementary material for: Questionnaire Breakoff and Item Nonresponse in Web-Based Questionnaires: Multilevel Analysis of Person-Level and Item Design Factors in a Birth Cohort
Source: PubMed Central journal article supplement (PMC6303736; doi:10.2196/11046), 2018-12-07
Supplement: jmir_v20i12e11046_app1.pdf [file jmir_v20i12e11046_app1.pdf]

Multimedia Appendix 1: Examples of the item characteristics: (a) radio item with two response options; (b) checkbox item with three response options; (c) dropdown item with five response options; (d) text item; and (e) three radio items located in a grid with two response options each. Radio and dropdown items can only have one response option selected, while checkbox items can have more than one answer selected.

**(a)**

During the first 12 months of pregnancy, did you follow any diet to lose weight?

- Yes
- No

**(b)**

Select which of the following diseases you have been diagnosed by a doctor:

- Asthma
- Rhinitis
- Bronchitis
- None of the above

**(c)**

During the first three months of pregnancy, how often you used pesticides?

▼

- Never
- Less than one time per week
- One time per week
- From two to six times per week
- Everyday

**(d)**

What is your height?

**(e)**

During the first three months of pregnancy, did you have contact with someone with...

|                     | <b>Yes</b>            | <b>No</b>             |
|---------------------|-----------------------|-----------------------|
| ...tuberculosis?    | <input type="radio"/> | <input type="radio"/> |
| ...varicella?       | <input type="radio"/> | <input type="radio"/> |
| ...cytomegalovirus? | <input type="radio"/> | <input type="radio"/> |
